# Supplementary material for: A Mediterranean Diet Model in Australia: Strategies for Translating the Traditional Mediterranean Diet into a Multicultural Setting
Source: PubMed Central journal article supplement (PMC5946250; doi:10.3390/nu10040465), 2018-04-09
Supplement: nutrients-10-00465-s001.pdf [file nutrients-10-00465-s001.pdf]

Figure S1: Mediterranean Diet: Two week meal plan

WEEK 1

|           | Monday                                                                                                             | Tuesday                                                                                                                        | Wednesday                                                                                                      | Thursday                                                                                                                                | Friday                                                                                                                    | Saturday                                                                                                                                                                                                                                          | Sunday                                                                                                                                |
|-----------|--------------------------------------------------------------------------------------------------------------------|--------------------------------------------------------------------------------------------------------------------------------|----------------------------------------------------------------------------------------------------------------|-----------------------------------------------------------------------------------------------------------------------------------------|---------------------------------------------------------------------------------------------------------------------------|---------------------------------------------------------------------------------------------------------------------------------------------------------------------------------------------------------------------------------------------------|---------------------------------------------------------------------------------------------------------------------------------------|
| Breakfast | Porridge (cooked rolled oats with skim milk) with honey cinnamon and berries<br><br>Herbal Tea                     | 2 slices of Soy and Linseed bread with chopped tomato, onion, herbs, olive oil and lemon juice<br><br>Coffee                   | Greek style low fat yogurt with chopped fruit, honey, cinnamon and nuts walnuts/ almonds<br><br>Coffee         | 2 pieces of Soy and Linseed bread with poached/boiled egg sliced, avocado a squeeze of lemon juice and cracked pepper<br><br>Herbal Tea | Porridge (cooked rolled oats with skim milk) cinnamon, bananas and honey<br><br>Herbal Tea                                | 2 slices of Soy and Linseed bread with poached eggs in tomato stew<br><br>Coffee                                                                                                                                                                  | Greek style low fat yogurt with chopped fruit, honey and cinnamon.<br><br>Coffee                                                      |
| Snack     | Small handful of Walnuts                                                                                           | Low fat Greek yogurt with honey                                                                                                | Very small handful of Sultanas Sesame snack bar                                                                | Low fat Greek yogurt with berries (fresh/frozen) and honey                                                                              | 2 slices of watermelon                                                                                                    | Low fat Greek yogurt with honey                                                                                                                                                                                                                   | 2 slices of honeydew                                                                                                                  |
| Lunch     | Soy and linseed sandwich with spinach, tinned tuna in olive oil, tomato and onion                                  | Left over Lentil soup drizzled with olive oil with 2 slices of soy and linseed bread and a piece of feta<br><br>Piece of fruit | 2 slices of toasted soy and linseed bread with canned sardines in olive oil, with tomato and onion             | Left over baked risoni with lamb and salad (lettuce cucumber and spring onion) dressed in olive oil. Slice of Soy and linseed bread     | Soy and linseed sandwich with feta cheese and roasted vegetables drizzled with olive oil                                  | Left over Cannellini bean soup (white bean soup) with a slice of grain bread<br><br>Piece of fruit                                                                                                                                                | Salad (pear, walnut and rocket) dressed with olive oil with tinned salmon and 2 slices of soy and linseed bread<br><br>Piece of fruit |
| Snack     | Pear                                                                                                               | Small handful of Almonds with 2 dried figs                                                                                     | Grapes                                                                                                         | 3 Dried apricots with a small handful of almonds                                                                                        | Small handful of Walnuts                                                                                                  | Small handful of Almonds                                                                                                                                                                                                                          | Small handful of Walnuts                                                                                                              |
| Dinner    | Lentil soup drizzled with olive oil with 1 slice of soy and linseed bread and a piece of feta<br><br>Glass of wine | Baked snapper with baked potato and boiled greens with olive oil and lemon juice<br><br>Glass of wine                          | Baked risoni with lamb and salad (lettuce cucumber and spring onion) dressed in olive oil<br><br>Glass of wine | Chicken soup with egg and lemon<br>Carrot and coleslaw salad<br>With a slice of soy and linseed bread<br><br>Glass of wine              | Cannellini bean soup (white bean soup) drizzled with olive oil with a slice of soy and linseed bread<br><br>Glass of wine | Stewed chicken livers* with caramelised red onion in a red wine and oregano sauce, boiled greens with olive oil and lemon juice and with 2 slices of soy linseed bread<br><i>*can replace chicken livers with chicken fillet</i><br>Glass of wine | Green pea casserole with beef<br>Rice pilaf with Greek coleslaw salad<br><br>Glass of wine                                            |
| Snack     | 3 Dry figs                                                                                                         | Two slices Rockmelon                                                                                                           | Very small handful of Walnuts and a mandarin                                                                   | Risogalo (rice pudding)                                                                                                                 | Orange                                                                                                                    | 3 Dried figs                                                                                                                                                                                                                                      | Piece of baklava                                                                                                                      |

WEEK 2

|           | Monday                                                                                                                 | Tuesday                                                                                                                                                                                 | Wednesday                                                                                                                                           | Thursday                                                                                                                                       | Friday                                                                                                                             | Saturday                                                                                                                     | Sunday                                                                                                           |
|-----------|------------------------------------------------------------------------------------------------------------------------|-----------------------------------------------------------------------------------------------------------------------------------------------------------------------------------------|-----------------------------------------------------------------------------------------------------------------------------------------------------|------------------------------------------------------------------------------------------------------------------------------------------------|------------------------------------------------------------------------------------------------------------------------------------|------------------------------------------------------------------------------------------------------------------------------|------------------------------------------------------------------------------------------------------------------|
| Breakfast | Porridge (cooked rolled oats with skim milk) honey, cinnamon and berries                                               | 2 slices of Soy and Linseed bread with chopped tomato, onion, herbs, olive oil and lemon juice                                                                                          | Greek style low fat yogurt with chopped fruit, honey, cinnamon and nuts (walnuts/ almonds)                                                          | 2 slices of Soy and Linseed bread with ricotta cinnamon and honey<br><br>Piece fruit                                                           | Porridge (cooked rolled oats with skim milk) honey, cinnamon and bananas                                                           | 2 slices of Soy and Linseed bread with poached eggs, spinach and tomato dressed with olive oil and cracked pepper            | Greek style low fat yogurt with chopped fruit, honey and cinnamon<br><br>Coffee                                  |
|           | Herbal Tea                                                                                                             | Coffee                                                                                                                                                                                  | Coffee                                                                                                                                              | Herbal Tea                                                                                                                                     | Herbal Tea                                                                                                                         | Coffee                                                                                                                       |                                                                                                                  |
| Snack     | Small handful of Walnuts                                                                                               | Low fat Greek yogurt with honey                                                                                                                                                         | <u>Very</u> small handful of sultanas<br>Sesame snack bar                                                                                           | Low fat Greek yogurt with berries (fresh or frozen)                                                                                            | 2 slices of watermelon                                                                                                             | Low fat Greek yogurt with honey sprinkled with walnuts                                                                       | Slice of honeydew                                                                                                |
| Lunch     | Soy and linseed sandwich with spinach, tinned salmon in olive oil, tomato and onion                                    | Salad (spinach and rocket, tomato, cucumber, capsicum) with tinned 4 bean mix, herbs and feta cheese dressed with olive oil and vinegar<br>2 slices soy linseed bread<br>Piece of fruit | 2 slices of toasted soy and linseed bread with canned sardines, olive oil, tomato and onion                                                         | Leftover Beef and cauliflower casserole with salad (lettuce cucumber and spring onion) dressed in olive oil and slice of Soy and Linseed bread | Soy and linseed sandwich with feta cheese and roasted vegetables sprinkled with olive oil                                          | Salad (pear, walnut and rocket) dressed with olive oil with tinned tuna and 2 slices soy linseed bread<br><br>Piece of fruit | Left over Stuffed tomatoes with rice and bean salad, dressed in olive oil                                        |
| Snack     | Pear                                                                                                                   | Dried figs with a small handful of almonds                                                                                                                                              | Grapes                                                                                                                                              | Apple and small handful of walnuts                                                                                                             | Small handful of Almonds                                                                                                           | Apple                                                                                                                        | Small handful of Walnuts                                                                                         |
| Dinner    | Baked (small) chicken breast*with broccoli and salad both dressed in olive oil<br>With couscous *(recipe not supplied) | Baked salmon with boiled greens and beetroot salad dress in olive oil<br><br>Baked potato<br>Glass of wine                                                                              | Beef and cauliflower casserole with salad (lettuce, tomato, cucumber and spring onion) dressed in olive oil and a baked potato<br><br>Glass of wine | Vegetable bake with Greek salad and feta<br><br>Glass of wine                                                                                  | Chicken casserole with onions and wine, rice and boiled warm wild greens dressed in olive oil and lemon juice<br><br>Glass of wine | Stuffed tomatoes with rice and black eyed bean salad, dressed in olive oil<br><br>Glass of wine                              | Eggplant moussaka with lamb mince and Greek coleslaw salad<br>1 slice Soy and Linseed bread<br><br>Glass of wine |
| Snack     | 3 Dry figs                                                                                                             | 2 slices of Rockmelon                                                                                                                                                                   | <u>Very</u> small handful of Walnuts with a kiwi fruit                                                                                              | Risogalo (rice pudding)                                                                                                                        | Pear                                                                                                                               | 3 dried figs and a very small handful of almonds                                                                             | Piece of baklava                                                                                                 |

## Guidelines to assist you in following the meal plan.

### *Main meals*

- If you do not like one of the meals on the meal plan you may substitute it for another meal which cooks with the same protein, e.g. if you don't like salmon you may have another type of fish or seafood.

### *Sides*

- If you wish to replace a side for something else you must substitute it for the same category of food (vegetables for vegetables, do not swap vegetables for a carbohydrate), e.g. if you don't like broccoli you may instead have another source of leafy greens or vegetables, however you must not replace it for rice.

### *Left Overs*

- Many of the meals make 4-6 serves; these can be frozen to avoid having to cook every time. This especially works well for soups which make many serves and freeze very well. **OR**
- You may have left over meals from dinner for lunch the following day, ensure that you include the salad/vegetable sides.

### *Fruit*

- Where there is a serve of fruit listed you may choose a serve of any fruit that you enjoy/ have available, e.g. 1 apple, 1 orange, 1 banana, a handful of grapes, a slice of melon etc.

### *Yogurt*

- Where Greek yogurt is listed as a snack you may have it plain or with nuts and honey or with some fresh or dried fruit. Add cinnamon for flavour.

### *Nuts*

- All nuts should be raw and unsalted.
- Almonds and walnuts are preferred but all varieties are acceptable.

### *Portions*

- Some of the meals have recommended portion sizes, these are just a guide. You should eat until you feel satisfied; this may be more or less of the suggested amount of food.

Copyright © 2017 by E.S. George & T. Kucianski  
All rights reserved. This resource or any portion thereof  
may not be reproduced or used in any manner whatsoever  
without acknowledgment.

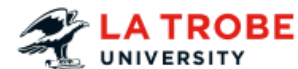

## Figure S2: Mediterranean Dietary Guidelines – Summary

1. Use extra virgin olive oil as the main added fat – aim for minimum 3-4 tablespoons (60-80ml) per day

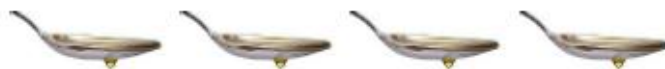

2. Eat vegetables with every meal – include 100g leafy greens, and 200g other vegetables daily; use onion and garlic daily; include 100 g tomatoes daily; fresh or sofrito (tomato based sauce).

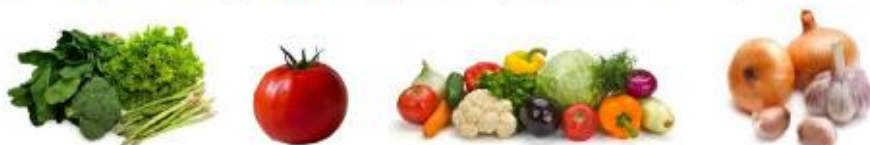

Leafy green veggies 1½ cups (raw) or ¾ cup cooked, 1 medium tomato or one tomato based meal, 2½ cups other veggies (raw) or 1½ cups other veggies (cooked), include onion/garlic in at least one meal per day (raw or cooked).

3. Include at least two legumes meals per week \*canned or dry legumes are acceptable, this may include tofu (1 serve = 250 g. This should replace meat.

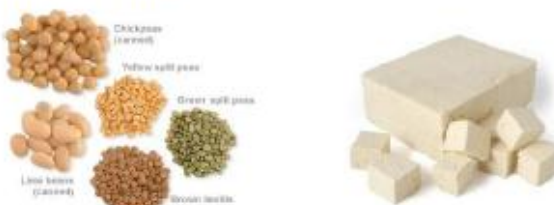

One serve is about half a standard can or 1½ cups (cooked).

4. Eat at least three servings of fish (1 serve = 100-150 g) or shellfish (1 serve = 200g) per week – include oily fish at least 1 – 2 times per week.

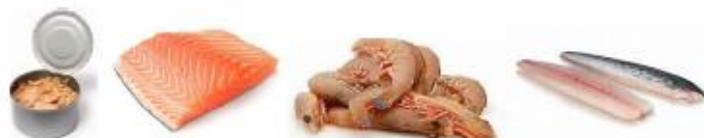

5. Eat red meat less often and choose smaller portions (150-200g weekly) (beef, lamb, pork). Limit white meat (200 – 250g per week) (poultry). Choose lean varieties.

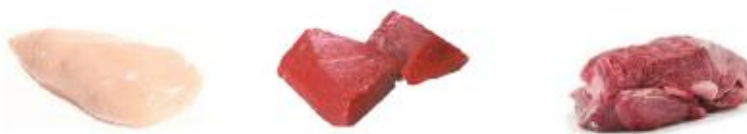

\*The recommended serving of 'meat' can be eaten in one meal or over multiple, as long as you do not exceed the maximum allowance per week.



6. Eat fresh fruit every day (300g or 2 serves).

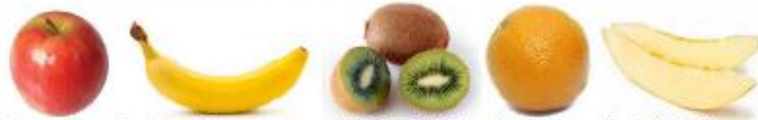

\*1 serve is equivalent to: 1 large fruit (apple, banana, orange) OR 2 small fruits (kiwi, apricot, plum) OR 2 slices of fruit (watermelon, rockmelon, pineapple) OR 15 grapes or cherries.

7. Eat a serve of nuts every day (1 serve = ~30g or 1/3 cup or a small handful daily) and dried fruit (2 tablespoons or 30g) as snacks or dessert;

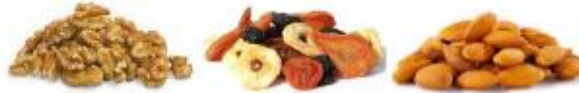

8. Eat dairy every day (2 serves) including milk (1 serve = 250ml or 1 cup) and yoghurt preferably Greek style yoghurt (1 serve = 150g or 1/2 cup);

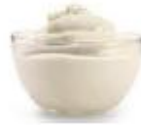

9. Eat cheese in moderation, about 3 times per week and preferably feta (1 serve = 30g or the size of a matchbox);

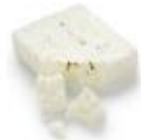

10. Include wholegrain breads and cereals with meals such as wholegrain bread, rice, pasta and potato (1 serve = 1 slice of bread or 1/2 cup, 50-60g cooked pasta/rice or 1 small 100g potato)

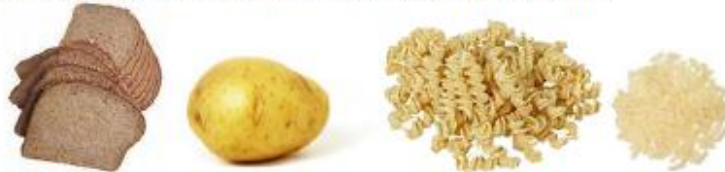

11. OPTIONAL Consume wine in moderation (preferably red), (0-2 glasses, 100ml per glass) and always with meals and don't get drunk.

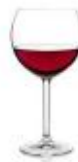

12. Have sweets or sweet drinks in moderate amounts and on special occasions only.

13. Consume no more than 3 eggs per week and select free range or omega 3 varieties.

Copyright © 2017 by E.S. George & T. Kuciński  
 All rights reserved. This resource or any portion thereof  
 may not be reproduced or used in any manner whatsoever  
 without acknowledgment.

**Figure S3: MEDITERRANEAN DIET PYRAMID**

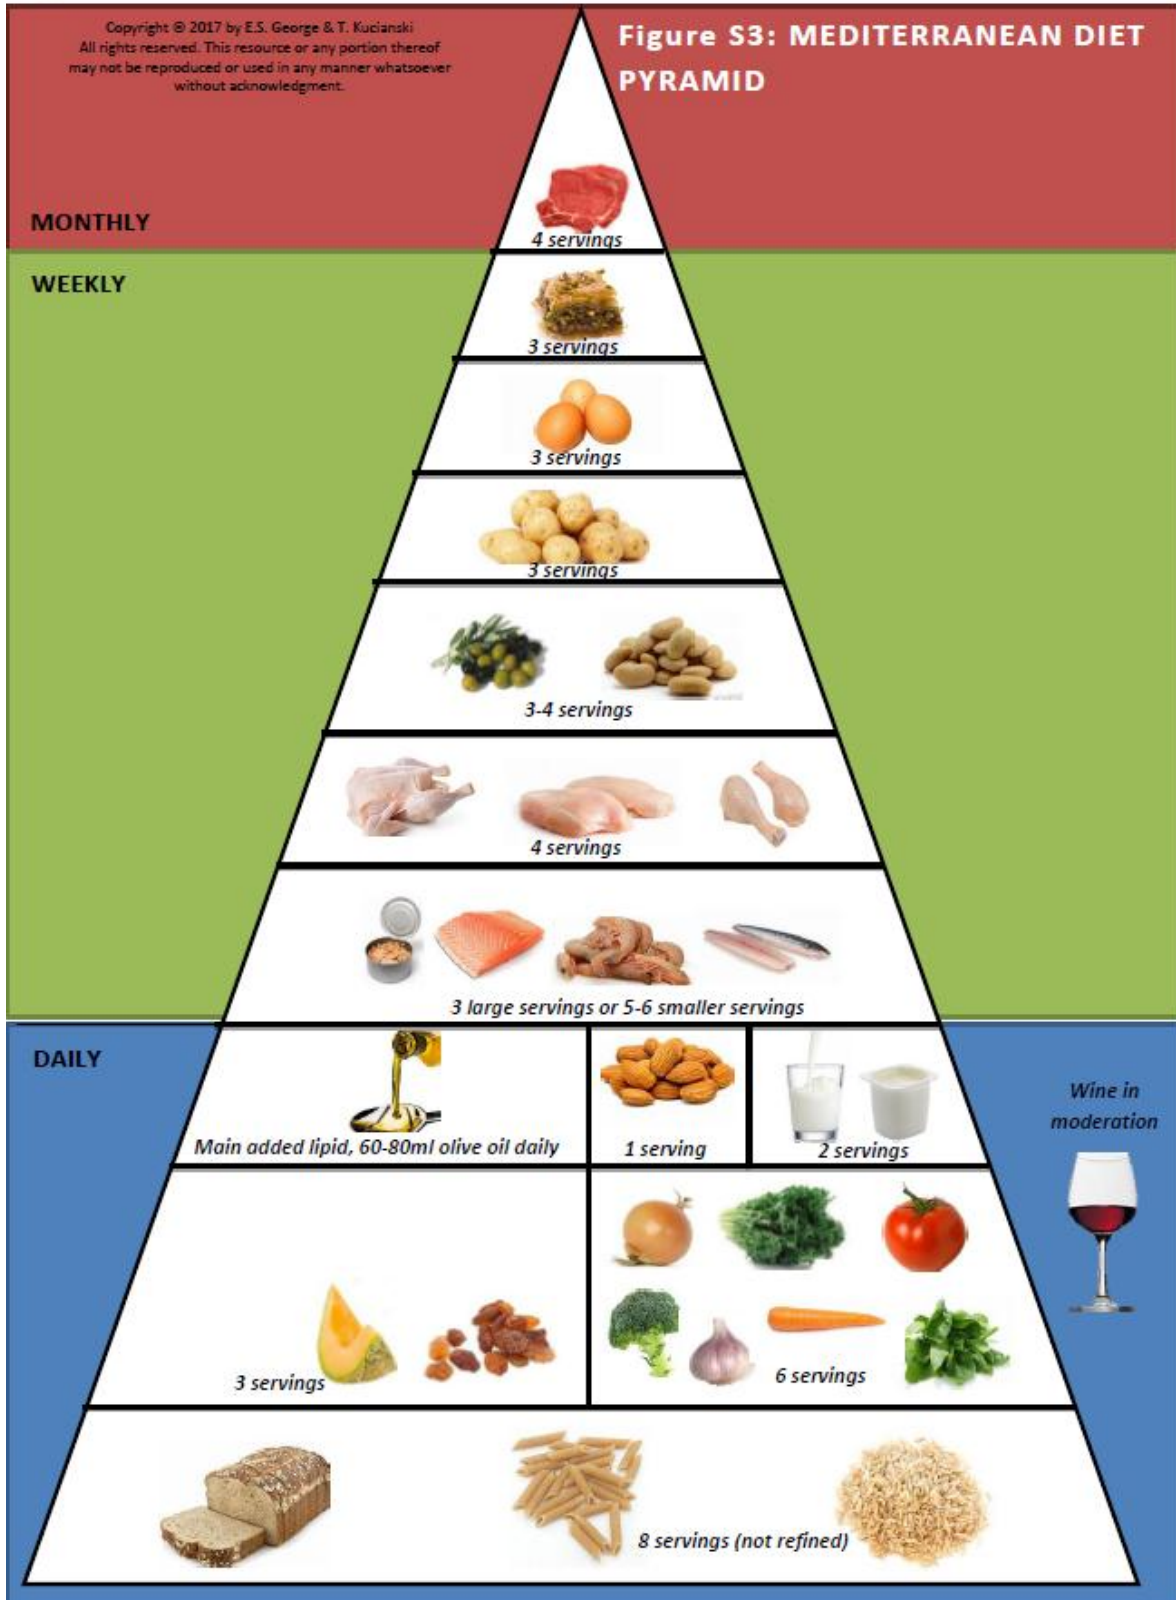

Figure S4: No Cooking Meal options

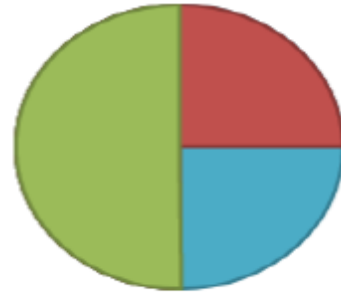

## “No Cooking” Meal Options

### Protein

Canned Beans; 4 bean mix, chickpeas, kidney beans, cannellini beans, brown lentils,  
Canned Fish; tuna in oil or water, salmon, sardines, trout, mackerel  
Canned seafood; oysters, octopus, mussels,  
Canned Chicken; in oil or water  
Nuts; almonds, walnuts, hazelnuts, whole or spreads

+

### Veggies/salad

Salad: Salad mix, Lettuce tomato and cucumber, cabbage and carrot shredded, spinach and tomatoes, beetroot and rocket, celery carrot and capsicum.  
Vegetables: Frozen veggies (mixed or individual varieties), left over veggies from dinner.  
*There are just examples and there are many other possible variations.*

+

### Carbohydrate

Whole grain crackers  
Soy and Linseed bread; plain or toasted  
Whole grain wrap; plain or toasted  
Rice; Brown rice or brown rice and quinoa sachet can be microwaved, left over from dinner  
Couscous; pour enough boiling water to coat grains in a bowl or container, these will be ready to eat in 2 minutes.  
Potato (white or sweet); left over from dinner or cooked in the microwave  
Pasta; left over from dinner  
Noodles; fresh varieties cooked by coating with boiling water for 5 minutes and draining

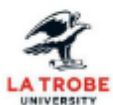

Copyright © 2017 by E.S. George  
All rights reserved. This resource or any portion thereof  
may not be reproduced or used in any manner whatsoever  
without acknowledgment.

Figure S6: Shopping List

# Shopping List

Required Ingredients for the two week menu supplied.

## Vegetables

Onions (brown and red)  
Garlic  
Spinach  
Lettuce (cos, rocket)  
Cucumber  
Spring onions  
Rocket  
Potatoes  
Wild Greens- endive, chicory, dandelion, sow thistle or mixed leafy greens  
Eggplant  
Frozen peas  
Carrots  
Cabbage  
Capsicum  
Green beans  
Broccoli  
Beetroot (canned ok)  
Celery  
Zucchini  
Cauliflower

## Grains

Rolled Oats  
Soy and Linseed Bread  
Rice  
Risoni pasta  
Lentils green or brown (dry)  
Cannellini beans (dry or canned)  
Black eyed beans (dry)  
Canned 4 bean mix

## Dairy

Skim milk  
Greek style Low Fat yogurt  
Feta cheese  
Reduced fat ricotta

## Beverages

Herbal Tea  
Red Wine  
White wine (for cooking)

## Fruit

Frozen berries  
Tomatoes  
Lemon  
Avocado  
Pears  
Apples  
Grapes  
Bananas  
Melon (honey dew/ rockmelon/ watermelon)  
Oranges  
Mandarin

## Poultry/ Seafood / Meat

Eggs  
Tuna tinned in olive oil/spring water  
Salmon tinned in olive oil/spring water  
Sardines canned  
Snapper, whole  
Skinned chicken pieces  
Lamb loins (lean)  
Chicken breast  
Salmon  
Lamb Mince (lean)  
Lean Beef

## Other

Olive oil  
Spices such as cinnamon, nutmeg, bay leaf, chilli flakes, cloves  
Mixed Herbs such as oregano, parsley, thyme  
Vinegar- balsamic  
Walnuts  
Almonds  
Sultanas  
Dry figs  
Honey  
Pureed tomatoes  
Currants  
Sesame snack bars  
Breadcrumbs

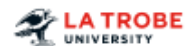

Copyright © 2017 by E.S. George & T. Kucianski  
All rights reserved. This resource or any portion thereof  
may not be reproduced or used in any manner whatsoever  
without acknowledgment.
